# Supplementary material
Source: publisher figshare collection journal article supplement (https://tandf.figshare.com/ndownloader/files/13525193)
Supplement: Supplementary file 1 [file 13525193]

Supplementary Table 3

Correlations between MEA results and blood loss

|  | ADP | p | ASPI | p | COL | p | TRAP | p |
| --- | --- | --- | --- | --- | --- | --- | --- | --- |
| i | r=-0.249 | 0.015 | r=-0.086 | 0.404 | r=-0.141 | 0.173 | r=-0.048 | 0.642 |
| ii | r=-0.176 | 0.086 | r=-0.116 | 0.262 | r=-0.046 | 0.661 | r=0.015 | 0.881 |
| iii | r=-0.127 | 0.219 | r=-0.080 | 0.438 | r=-0.032 | 0.757 | r=-0.036 | 0.730 |
| iv | r=-0.062 | 0.546 | r=-0.051 | 0.618 | r=0.116 | 0.257 | r=0.149 | 0.143 |

Time points; baseline (i), during CPB (ii), after CPB decanulation and protamine (iii) and arrival at the ICU (iv).
